# Supplementary material
Source: publisher figshare collection journal article supplement (https://rs.figshare.com/ndownloader/files/12940127)
Supplement: Supplementary file 1 [file 12940127]

## Sheet: HeadOscillationFreqs
Electronic Supplementary Materials for:
Come on baby, let’s do the twist: the kinematics of killing in loggerhead shrikes
Diego Sustaita, Margaret A. Rubega, and Susan M. Farabaugh
Data S1. Axial head-rolling oscillation frequencies determined from 28 video sequences obtained from 13 individual shrikes.
BirdID	Bodymass	Sex	Age	Prey	VideoDate	Code	Strike	StartFrame	EndFrame	NumberHalfOscillations	NumberFrames	VideoFps	Time(sec)	NumHalfOscillPerSec	DurationOfOscill(ms)	NumFullOscillPerSec
503	49.8	F	ADU	mouse	2011-02-25		1	179	193	3	14	125	0.112	26.7857	37.3333	13.3929
929	58.1	M	ADU	mouse	2011-02-22	b_128	1	176	193	4	17	125	0.136	29.4118	34	14.7059
929	58.1	M	ADU	mouse	2011-02-22	b_128	2	295	311	3	16	125	0.128	23.4375	42.6667	11.7188
929	58.1	M	ADU	mouse	2011-02-22	b_128	3	56	77	5	21	125	0.168	29.7619	33.6	14.881
929	58.1	M	ADU	mouse	2011-02-22	b_128	4	93	117	5	24	125	0.192	26.0417	38.4	13.0208
1569	48.4	F	ADU	mouse	2011-02-26		1	95	109	3	14	125	0.112	26.7857	37.3333	13.3929
1569	48.4	F	ADU	mouse	2011-02-26		2	122	129	1	7	125	0.056	17.8571	56	8.92857
1569	48.4	F	ADU	mouse	2011-02-26		3	143	154	2	11	125	0.088	22.7273	44	11.3636
1569	48.4	F	ADU	mouse	2011-02-26		4	186	196	2	10	125	0.08	25	40	12.5
1310	53.2	M	ADU	mouse	2011-02-21		1	244	255	2	11	125	0.088	22.7273	44	11.3636
1310	53.2	M	ADU	mouse	2011-02-21		2	520	529	1	9	125	0.072	13.8889	72	6.94444
1310	53.2	M	ADU	mouse	2011-02-21		3	673	691	3	18	125	0.144	20.8333	48	10.4167
1310	53.2	M	ADU	mouse	2011-02-21		4	770	783	2	13	125	0.104	19.2308	52	9.61538
2387	62.5	M	ADU	mouse	2012-06-10	v1	1	1584	1601	1	17	250	0.068	14.7059	68	7.35294
2555	NA	M	ADU	mouse	2012-06-21	v2	1	261	269	1	8	125	0.064	15.625	64	7.8125
2555	NA	M	ADU	mouse	2012-06-21	v2	2	392	409	3	17	125	0.136	22.0588	45.3333	11.0294
2391	55.9	F	ADU	mouse	2011-02-28		1	497	509	3	12	125	0.096	31.25	32	15.625
2391	55.9	F	ADU	mouse	2011-02-28		2	586	597	3	11	125	0.088	34.0909	29.3333	17.0455
2391	55.9	F	ADU	mouse	2011-02-28		3	653	661	1	8	125	0.064	15.625	64	7.8125
2564	51.5333	M	JUV	mouse	2011-06-16		1	40	44	1	4	50	0.08	12.5	80	6.25
2780	46.4333	M	JUV	mouse (hopper)	2012-06-11	v2	1	630	645	1	15	250	0.06	16.6667	60	8.33333
2780	46.4333	M	JUV	mouse (hopper)	2012-06-11	v2	2	737	769	3	32	250	0.128	23.4375	42.6667	11.7188
2791	47.1	F	JUV	lizard	2012-06-13	v1	1	184	206	2	22	250	0.088	22.7273	44	11.3636
2791	47.1	F	JUV	lizard	2012-06-13	v1	2	228	252	3	24	250	0.096	31.25	32	15.625
2791	47.1	F	JUV	lizard	2012-06-13	v1	3	296	315	2	19	250	0.076	26.3158	38	13.1579
2775	49.5	M	JUV	mouse	2012-06-17	v1	1	914	928	1	14	250	0.056	17.8571	56	8.92857
2784	46.3	F	JUV	mouse (hopper)	2012-06-10	v1	1	109	124	1	15	250	0.06	16.6667	60	8.33333
2526	45.8	F	JUV	mouse	2011-06-19		1	78	83	1	5	60	0.0833333	12	83.3333	6
